# Supplementary material for: Coordination of m6A mRNA Methylation and Gene Transcriptome in Sugarcane Response to Drought Stress
Source: MDPI journal article supplement (doi:10.3390/plants12213668), 2023-10-24
Supplement: s1 [file s1]

**Table S1.** The primers used for qRT-PCR.

|         | gene                 |   | 5' --3'               | T <sub>m</sub> (°C) | Product (bp) |
|---------|----------------------|---|-----------------------|---------------------|--------------|
| OAT     | Sspon. 01G0026110-2B | F | GAACCAGAAACTGTCCGCC   | 57.5                | 88           |
|         |                      | R | CACTAAGCGCCTTGGATGC   | 59.1                |              |
| HSP70   | Sspon. 01G0025470-3C | F | AGGACGAGGTGGAGAGGATG  | 58.6                | 101          |
|         |                      | R | GACTGACTCGGCTTGGTTCT  | 56.5                |              |
| DREB1A  | Sspon. 02G0009810-2B | F | GACCTCGTCGGAGCATCAC   | 58.1                | 453          |
|         |                      | R | GCAGCGTCGTCCTCGTT     | 57.1                |              |
| TPI     | Sspon. 03G0020430-3C | F | AGGTTCCCCCTTCAGATGTTG | 60.4                | 129          |
|         |                      | R | CACCTCCCTTCTTCACCCA   | 57.7                |              |
| FBA1    | Sspon. 03G0000790-3D | F | TCCCTGTCCTTCTCCTTCGG  | 61.3                | 157          |
|         |                      | R | CGGCAGCATCACCTTGTAG   | 61.4                |              |
| AVP1    | Sspon. 04G0016680-1A | F | TGGGCTTGCTTTGGGTACACA | 61.4                | 221          |
|         |                      | R | CACGAATCCTGTGGCTCATC  | 58.4                |              |
| FKBP70  | Sspon. 05G0026700-1B | F | AGGGCATTACACTGGCACTC  | 57.4                | 321          |
|         |                      | R | TCCCACTTCTCGCCTTCAAC  | 59.9                |              |
| GLYI-11 | Sspon. 06G0009730-1A | F | GGACCAGAGGACACCAACT   | 53.7                | 219          |
|         |                      | R | TGCGAAGGCAATAACAGTGGA | 61.6                |              |
| ALDH7B4 | MSTRG. 19319         | F | TGGTGCTGAAATCGGTGGAG  | 61.5                | 283          |
|         |                      | R | ACAAGTACGCCCATAAACGA  | 60.5                |              |
| GAPDH   | Sspon. 08G0001560-1A | F | AACGACCCCTTCATCACCAC  | 59.2                | 189          |
|         |                      | R | ATAGTCAGCACCAGCCTCAC  | 54.7                |              |
